# Supplementary material for: Catalytic reactivity of an iridium complex with a proton responsive N-donor ligand in CO2hydrogenation to formate
Source: Royal Society of Chemistry journal article supplement (doi:10.1039/c7ra12343d), 2018-01-01
Supplement: c7ra12343d1.pdf [file c7ra12343d1.pdf]

## Supporting Information

# Catalytic Reactivity of an Iridium Complex with a Proton Responsive N-Donor ligand in CO<sub>2</sub> Hydrogenation to Formate

Gunniya Hariyanandam Gunasekar,<sup>a†</sup> Yeahsel Yoon,<sup>a†</sup> Il-hyun Baek,<sup>b</sup> and Sungho Yoon<sup>\*a</sup>

### List of Figures

- Figure S1. Crystal structure of **1** in a unit cell
- Figure S2. Stabilization structure of **1**
- Figure S3. UV-Visible spectrum of **1**
- Figure S4. ESI-Mass spectrum of **1**.
- Figure S5. <sup>1</sup>H-NMR spectra of BiBzImH<sub>2</sub> ligand and **1**
- Figure S6. Expected structure of **1** under basic condition
- Figure S7. TOF between the hours
- Figure S8. <sup>1</sup>H-NMR spectrum of **1** after hydrogenation
- Figure S9. ESI-Mass spectrum of **1** after hydrogenation

### List of Tables

- Table S1. Formate formation rate at each interval of time.
- Table S2. Comparison of bond lengths and angles of **1** with [Cp\*Ir(Bpy)Cl]Cl
- Table S3. X-ray Crystallographic information of **1**

**Figure S1.** Crystal structure of **1** in a unit cell.

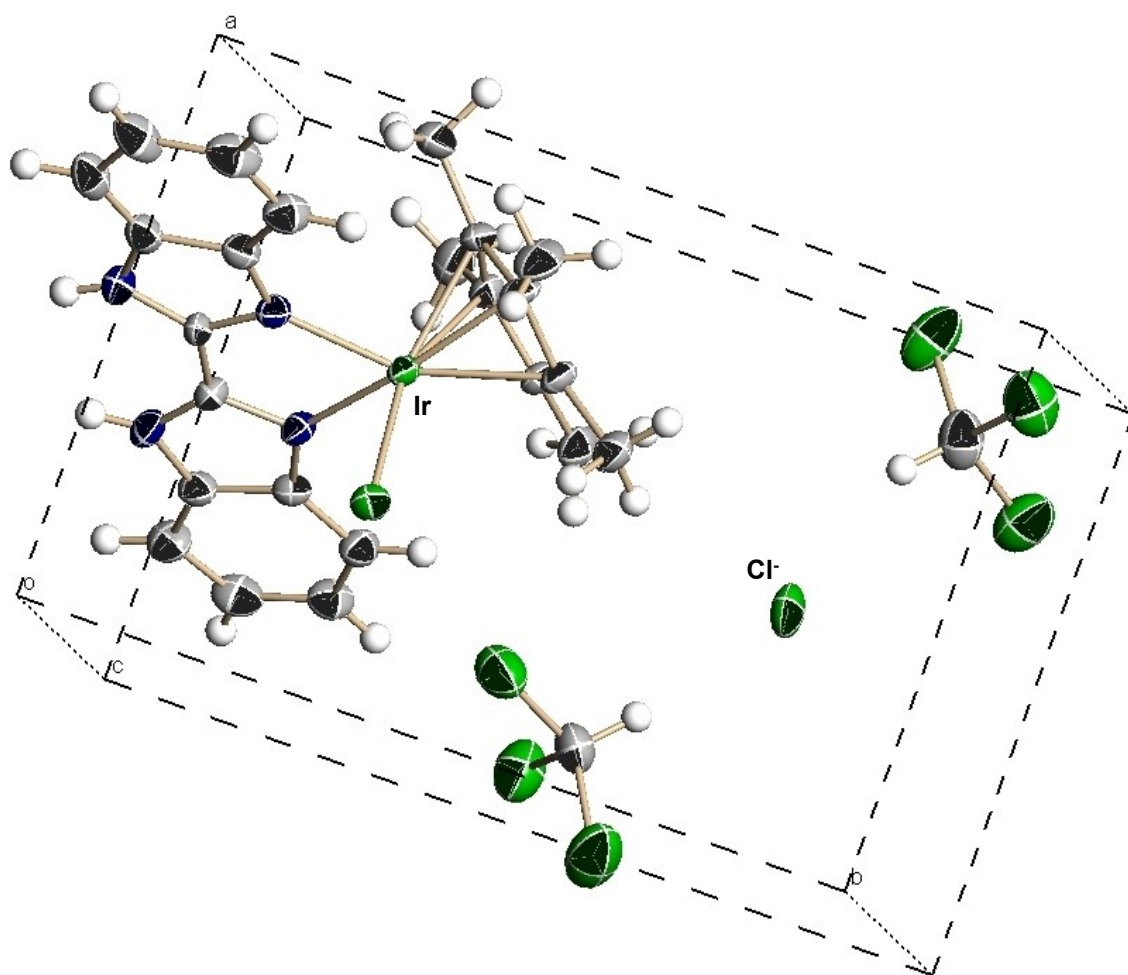

**Figure S2.** Stabilization structure of **1**. Protons on benzene ring and methyl groups on Cp\* are omitted for clarity.

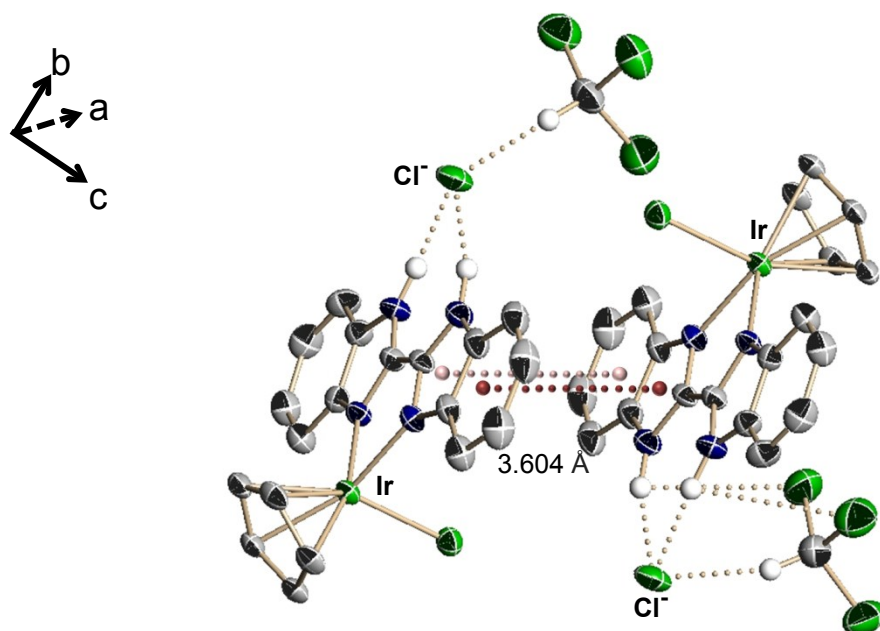

The crystal structure of **1** showed that the counter anion i.e. Cl<sup>-</sup> formed a weak hydrogen bond with N-H unit of BiBzImH<sub>2</sub> and to C-H of chloroform. In addition, two molecules of **1** were stabilized through  $\pi$ - $\pi$  interaction (of benzimidazole ring) with a distance of 3.604 Å.

**Figure S3.** UV-Visible spectrum of **1** in chloroform solution.

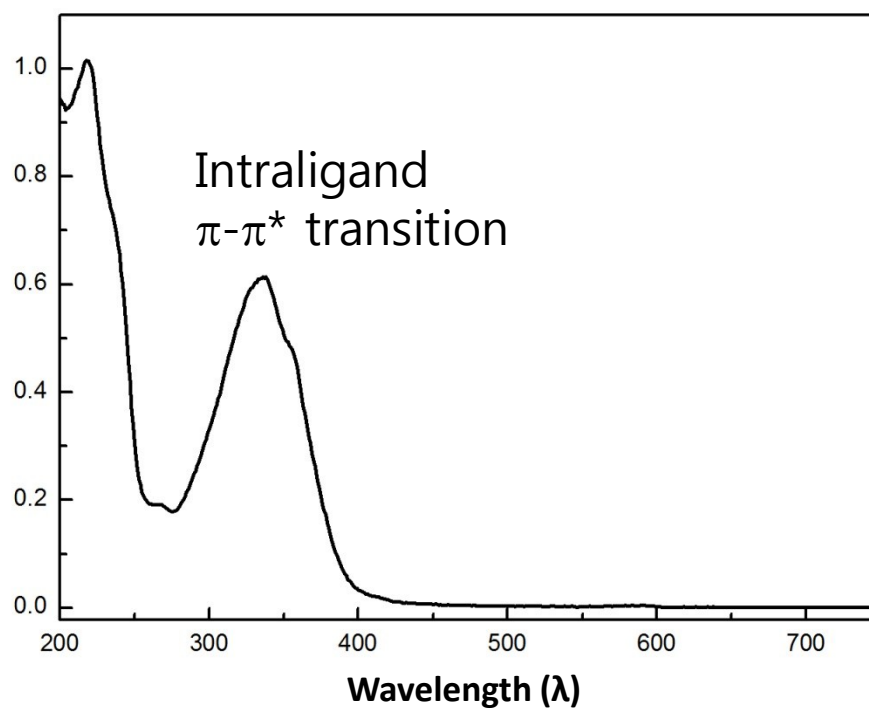

**Figure S4.** ESI-Mass spectra of **1**.

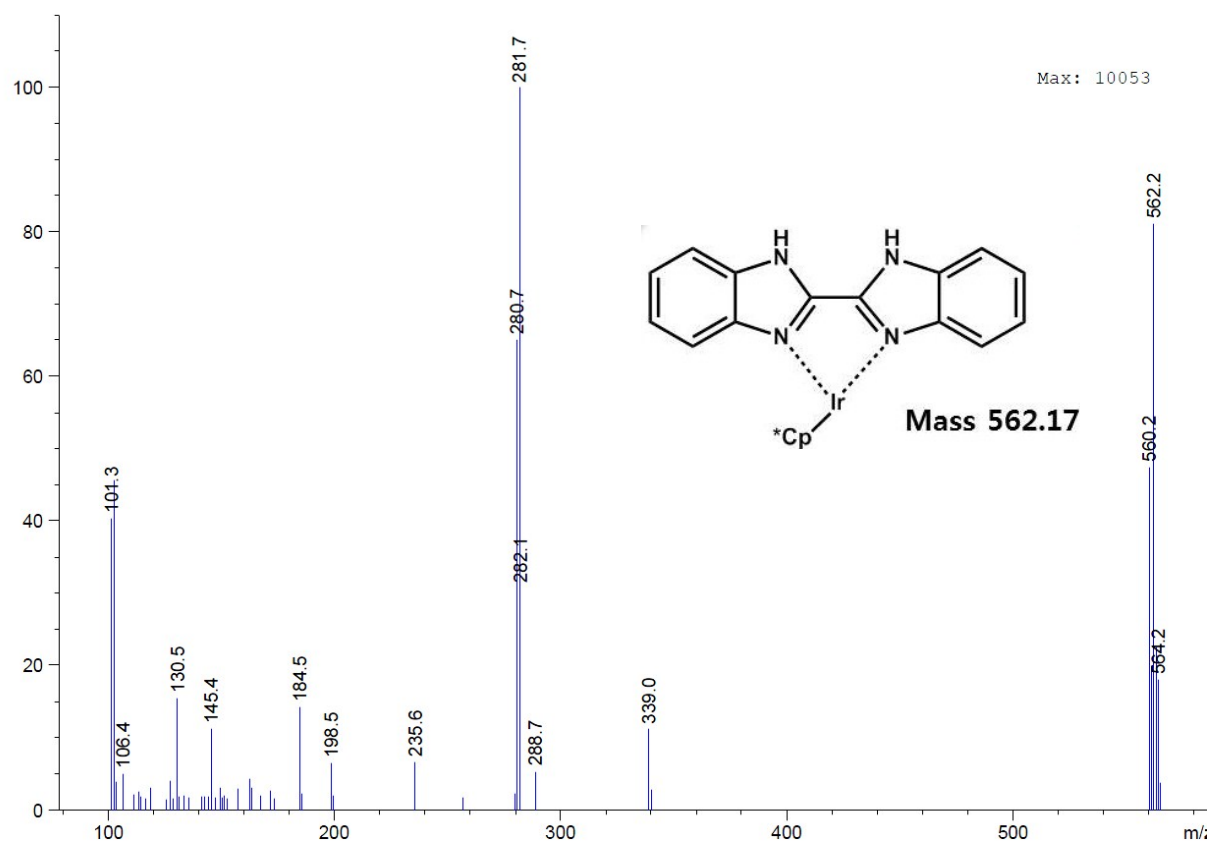

**Figure S5.**  $^1\text{H-NMR}$  spectra of BiBzImH<sub>2</sub> ligand in DMSO-d<sub>6</sub> and **1** in CDCl<sub>3</sub>

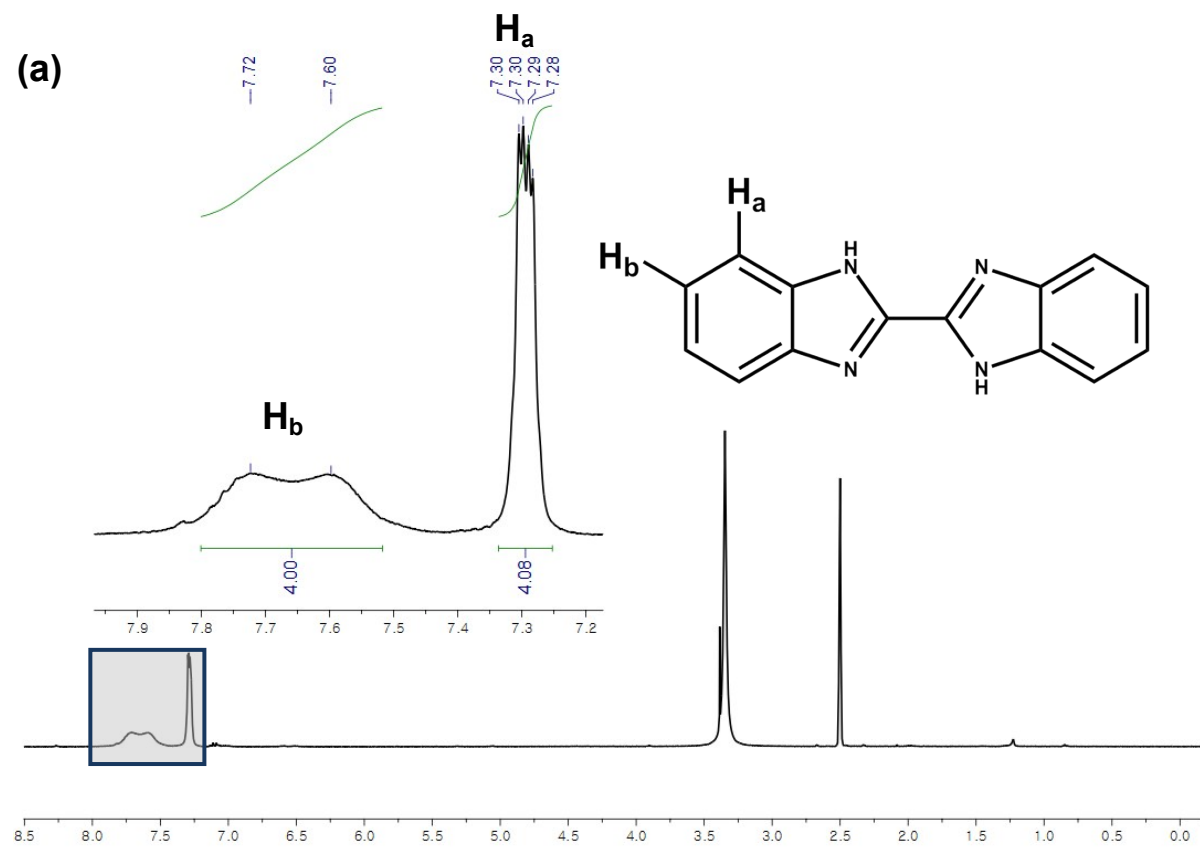

Figure S6. Expected structure of **1** under basic condition

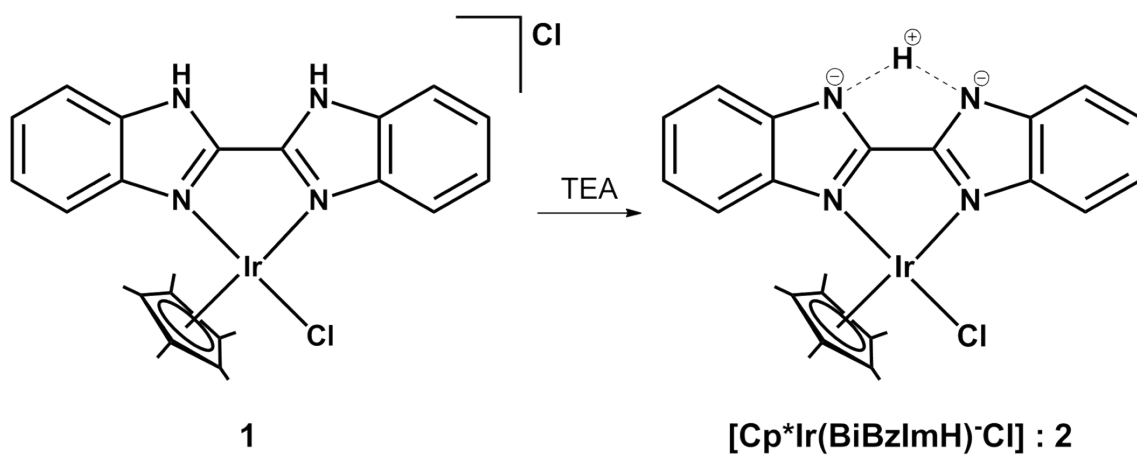

(b)

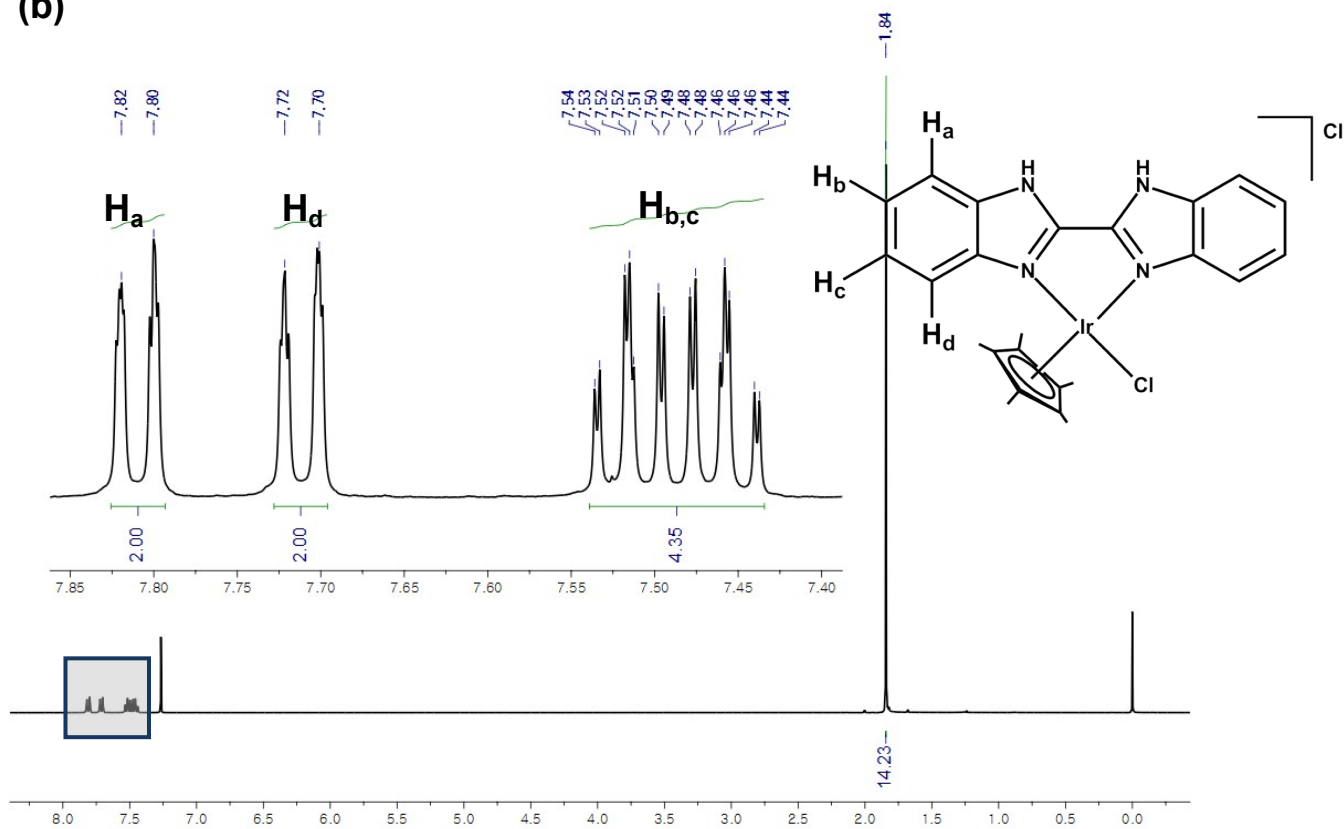

(c)

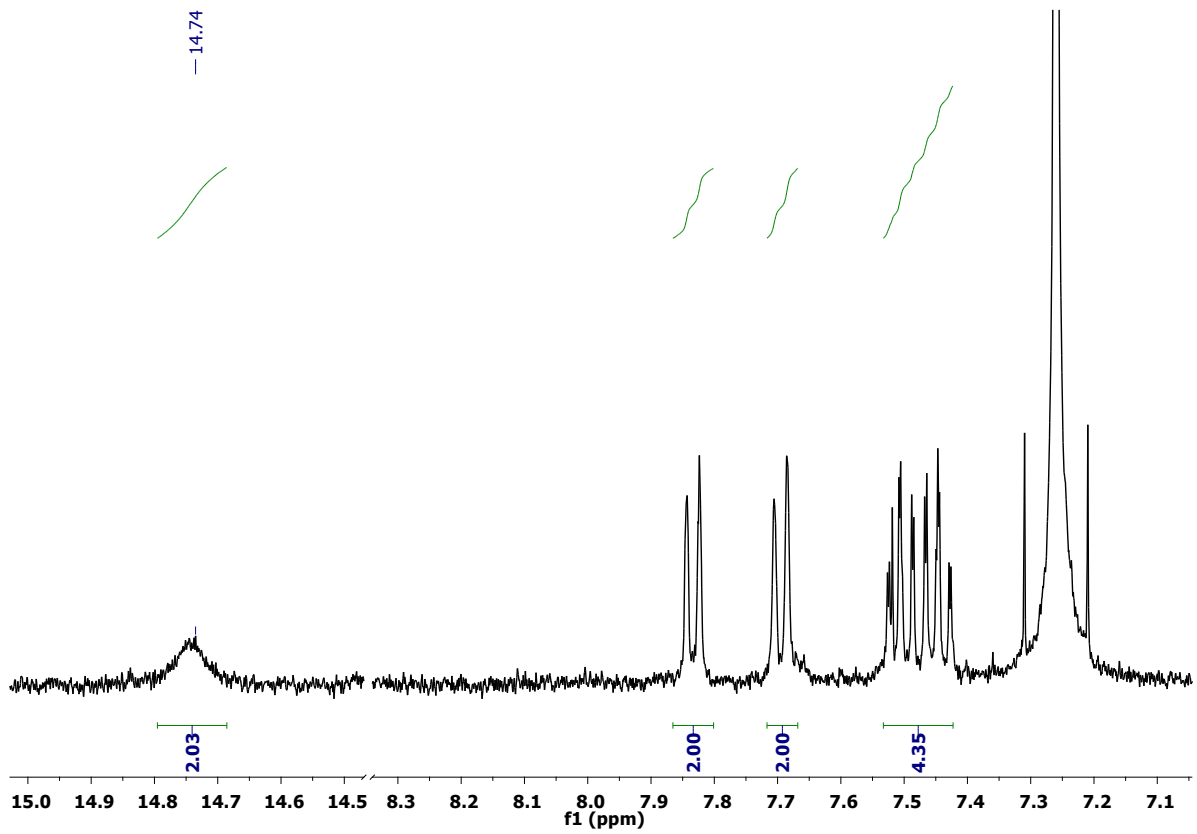

(d)

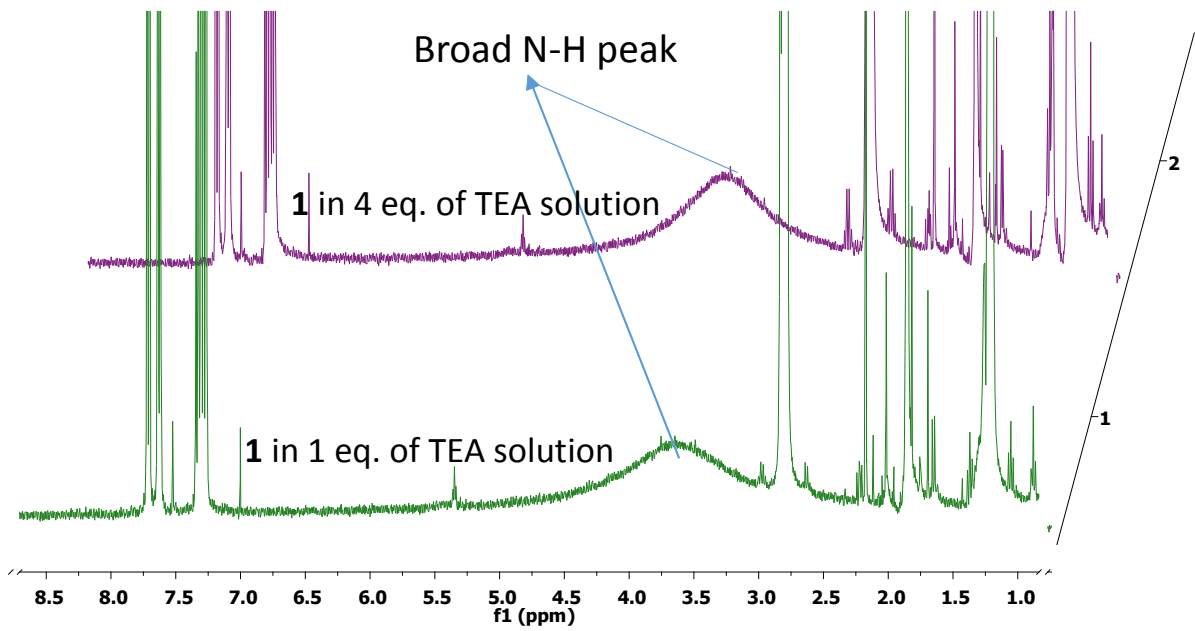



Figure S7. TOF between the time interval

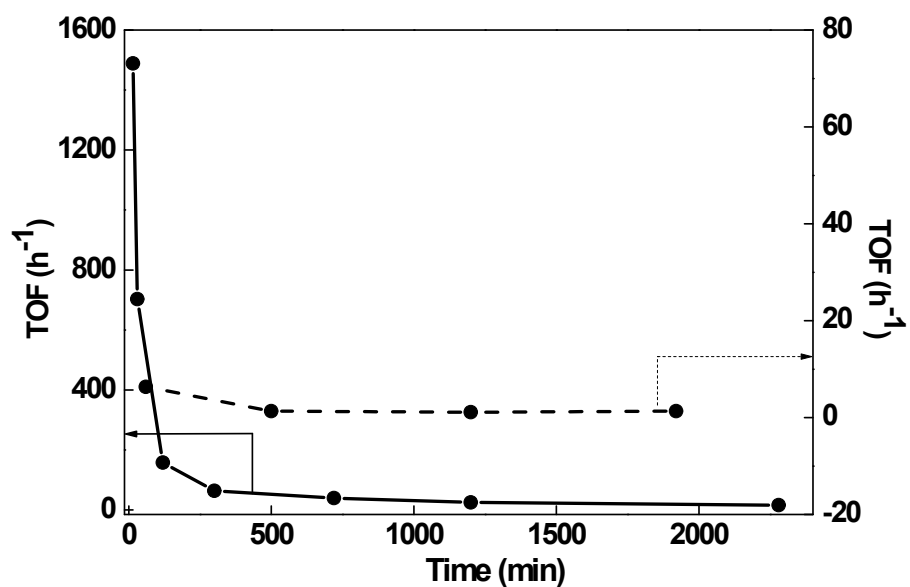

Figure S8. <sup>1</sup>H-NMR spectrum of 1 after hydrogenation

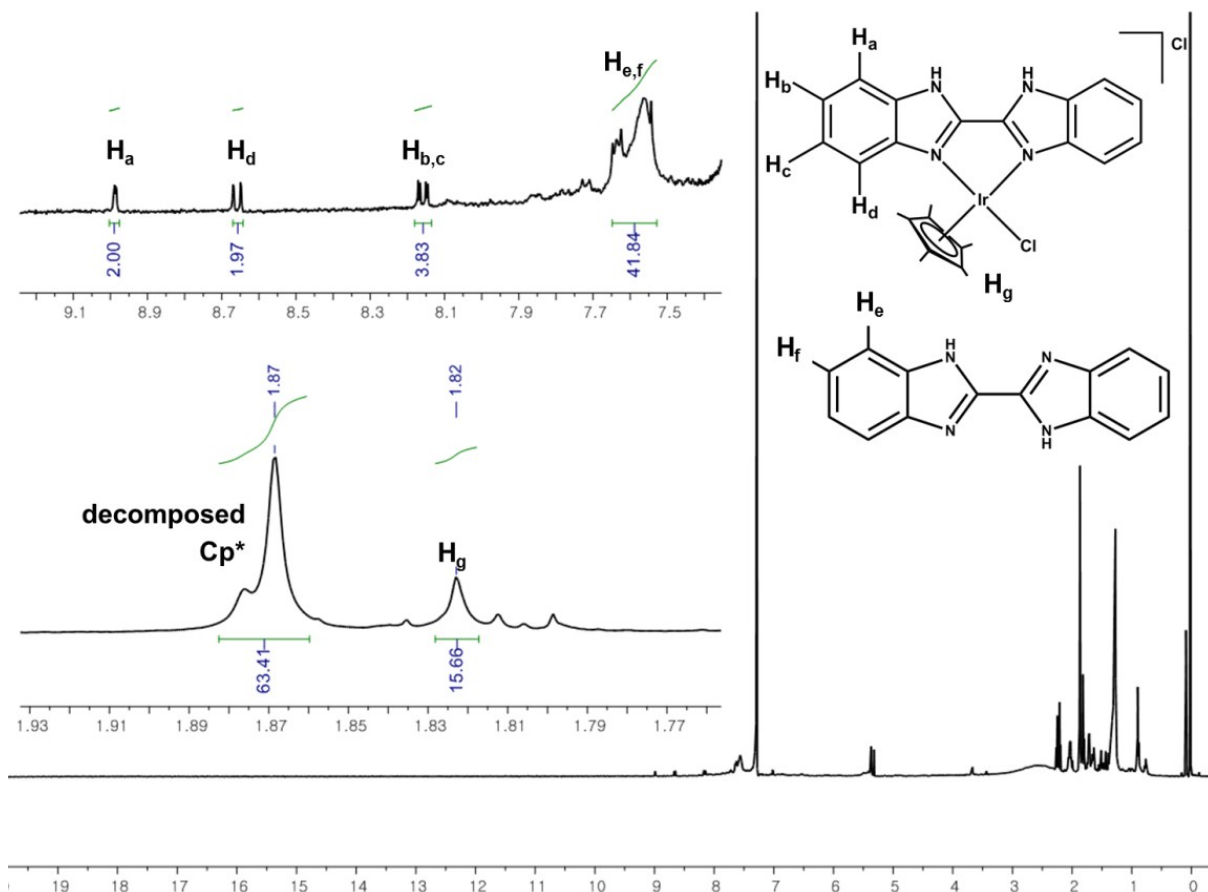

**Figure S9.** ESI-Mass spectrum of **1** after hydrogenation

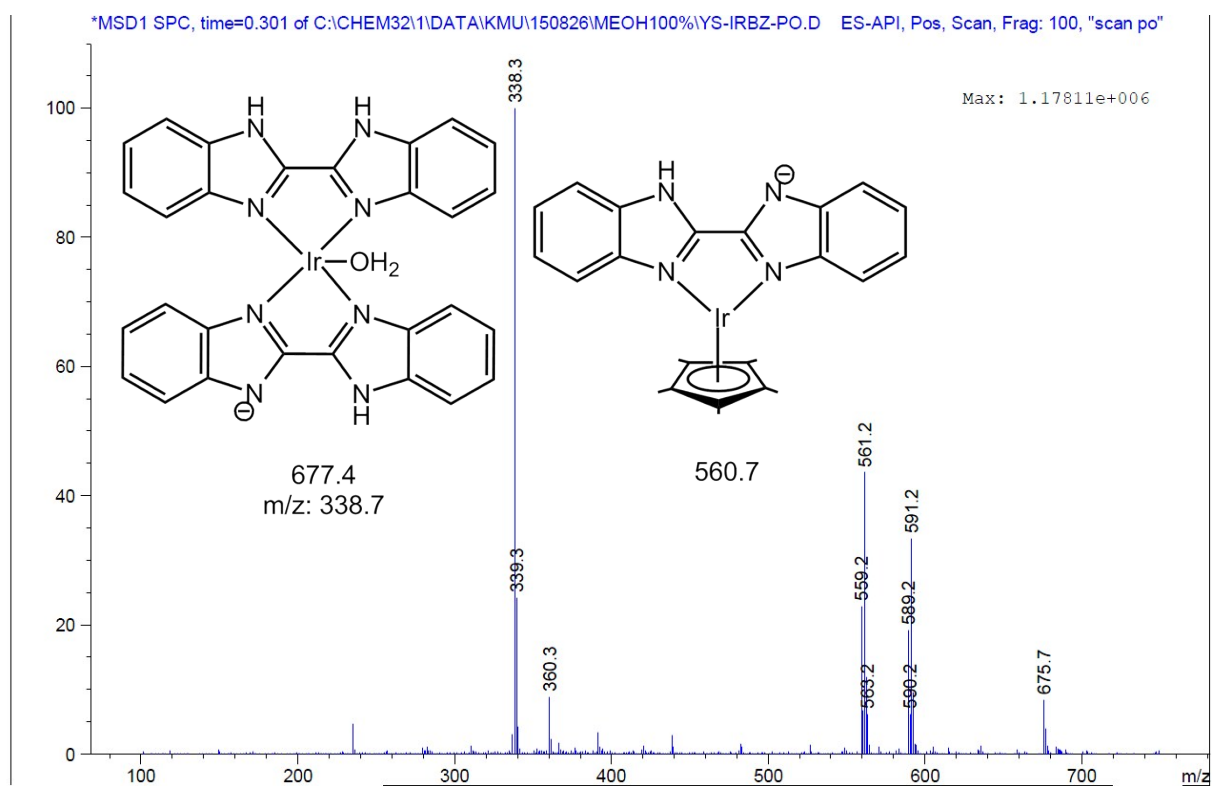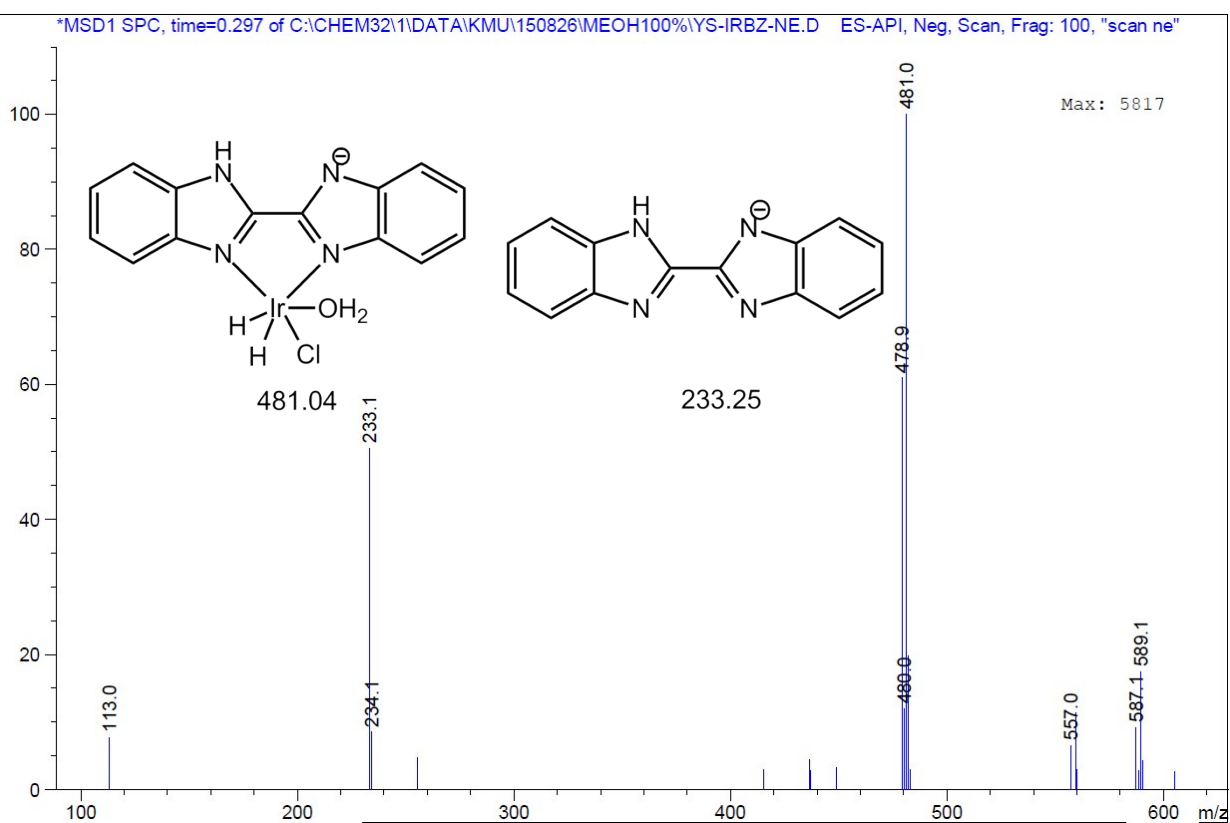

**Table S1.** TOF between the hours.

| Time (min) | (TOF/h) |
|------------|---------|
| 15         | 1500    |
| 30         | 700     |
| 120        | 158     |
| 300        | 65      |
| 720        | 40      |
| 1200       | 25      |
| 2280       | 16      |

**Table S2.** Comparison of bond lengths and angles of **1** with [Cp\*Ir(Bpy)Cl]Cl

|                                     | [Cp*Ir(Bpy)Cl] <sup>+</sup> | <b>1</b>   |
|-------------------------------------|-----------------------------|------------|
| Ir-N (Å)                            | 2.076 (8)                   | 2.127(2)   |
|                                     | 2.090 (9)                   | 2.148(2)   |
| Ir-Cl (Å)                           | 2.404 (2)                   | 2.3941(7)  |
| Ir-Cp* Centroid(Å)*                 | 1.785                       | 1.789      |
| N-Ir-Cl (°)                         | 85.47                       | 86.82      |
| Distortion angle (°)<br>(ligand-Ir) | 3.38                        | 6.32 (19)  |
| Internal angle of N-C-C             | 112.94                      | 114.55(18) |

● **N-C-C Internal angle**

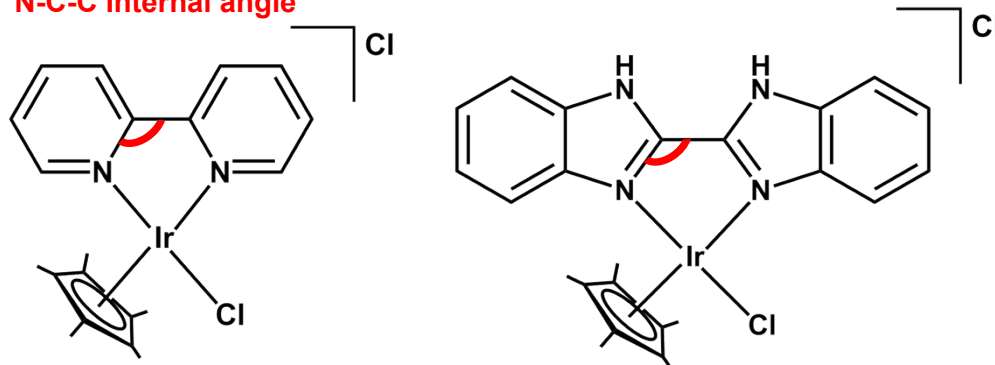

**Table S3.** X-ray Crystallographic information of **1**.

|                            |                                                                  |
|----------------------------|------------------------------------------------------------------|
| Formula                    | C <sub>26</sub> H <sub>27</sub> Cl <sub>8</sub> IrN <sub>4</sub> |
| <i>M<sub>r</sub></i>       | 874.34                                                           |
| Crystal system             | Monoclinic                                                       |
| Space group                | <i>P2<sub>1</sub>/n</i>                                          |
| Crystal color and shape    | Yellow block                                                     |
| Crystal size               | 0.09 x 0.16 x 0.20                                               |
| <i>a</i> (Å)               | 8.3668(4)                                                        |
| <i>b</i> (Å)               | 12.3575(5)                                                       |
| <i>c</i> (Å)               | 30.7228(13)                                                      |
| <i>β</i> (°)               | 90.5240(10)                                                      |
| <i>V</i> (Å <sup>3</sup> ) | 3176.4(2)                                                        |
| <i>Z</i>                   | 4                                                                |
| <i>T</i> (K)               | 223(2)                                                           |
| <i>F</i> (000)             | 1708                                                             |
| Scan range (°)             | 2.52 < <i>θ</i> < 28.49                                          |
| <i>R</i> <sub>int</sub>    | 0.0269                                                           |
| Goodness-of-fit            | 0.925                                                            |

$$R1 = \frac{\sum ||F_o| - |F_c||}{\sum |F_o|}; \quad wR2 = \left\{ \frac{\sum [w(|F_o|^2 - |F_c|^2)]^2}{\sum [w|F_o|^2]} \right\}^{1/2}$$
